# Supplementary material for: Bigfin reef squid demonstrate capacity for conditional discrimination and projected future carbon dioxide levels have no effect on learning capabilities
Source: PeerJ journal article supplement (doi:10.7717/peerj.9865), 2020-09-29
Supplement: Supplementary_Materials_-_Table_S1.pdf [file Supplementary_Materials_-_Table_S1.pdf]

**Table S1 – Statistical outputs.** Statistical outputs of variables and factors tested among all individuals and for only individuals that demonstrated conditional discrimination. Asterisks (\*) next to p-values less than 0.05 indicate a relationship to be significant different.

| Variable Tested                                                             | Factors                                | df | $\chi^2$ | p-value |
|-----------------------------------------------------------------------------|----------------------------------------|----|----------|---------|
| <b>All individuals</b>                                                      |                                        |    |          |         |
| Preference strength                                                         | Treatment                              | 11 | 1.000    | 0.317   |
| Ability to pass Task 2                                                      | Treatment                              | 11 | 0.707    | 0.401   |
|                                                                             | Task 1 cue                             | 11 | 2.464    | 0.116   |
|                                                                             | Preference strength                    | 11 | 0.416    | 0.519   |
| Ability to demonstrate conditional discrimination                           | Treatment                              | 11 | 0.024    | 0.876   |
|                                                                             | Task 1 cue                             | 11 | 5.967    | 0.015*  |
|                                                                             | Preference strength                    | 11 | 0.279    | 0.597   |
| Ability to pass Task (in individuals that reached Task 3)                   | Treatment                              | 6  | 1.243    | 0.265   |
| Ability to pass Task 2                                                      | Task 1 Time                            | 11 | 6.705    | 0.010*  |
| Ability to demonstrate conditional discrimination                           | Number of trials needed to pass Task 1 | 11 | 4.053    | 0.044*  |
| <b>Individuals that demonstrated conditional discrimination</b>             |                                        |    |          |         |
| Number of trials needed to pass Task 1                                      | Treatment                              | 5  | 0.262    | 0.609   |
| Number of trials needed to pass Task 2                                      | Treatment                              | 5  | 0.320    | 0.571   |
| Number of trials needed to pass Task 3                                      | Treatment                              | 5  | 0.069    | 0.511   |
| Time to exit arena in Task 1                                                | Treatment                              | 5  | 0.012    | 0.914   |
| Time to exit arena in Task 2                                                | Treatment                              | 5  | 0.433    | 0.511   |
| Time to exit arena in Task 3                                                | Treatment                              | 5  | 0.371    | 0.542   |
| Improvements over successive trials in the time to exit arena during Task 1 | Treatment                              | 5  | 0.001    | 0.971   |
|                                                                             | Trial number                           | 5  | 0.426    | 0.514   |
|                                                                             | Mantle length                          | 5  | 0.073    | 0.788   |
|                                                                             | Preference strength                    | 5  | 0.056    | 0.813   |

|                                                                                      |                                |   |       |        |
|--------------------------------------------------------------------------------------|--------------------------------|---|-------|--------|
|                                                                                      | Treatment<br>* Trial<br>number | 5 | 0.909 | 0.340  |
| Improvements over<br>successive trials in correct<br>exit choice during Task 1       | Treatment                      | 5 | 5.702 | 0.017* |
|                                                                                      | Trial<br>number                | 5 | 5.807 | 0.016* |
|                                                                                      | Mantle<br>length               | 5 | 5.551 | 0.018* |
|                                                                                      | Preference<br>strength         | 5 | 6.969 | 0.008* |
|                                                                                      | Treatment<br>* Trial<br>number | 5 | 0.073 | 0.787  |
| Improvements over<br>successive trials in the<br>time to exit arena during<br>Task 2 | Treatment                      | 5 | 3.249 | 0.071  |
|                                                                                      | Trial<br>number                | 5 | 0.431 | 0.511  |
|                                                                                      | Mantle<br>length               | 5 | 3.129 | 0.077  |
|                                                                                      | Preference<br>strength         | 5 | 0.591 | 0.442  |
|                                                                                      | Treatment<br>* Trial<br>number | 5 | 2.499 | 0.114  |
| Improvements over<br>successive trials in correct<br>exit choice during Task 2       | Treatment                      | 5 | 0.001 | 0.981  |
|                                                                                      | Trial<br>number                | 5 | 6.617 | 0.010* |
|                                                                                      | Mantle<br>length               | 5 | 0.663 | 0.416  |
|                                                                                      | Preference<br>strength         | 5 | 0.551 | 0.458  |
|                                                                                      | Treatment<br>* Trial<br>number | 5 | 1.960 | 0.162  |
| Improvements over<br>successive trials in the<br>time to exit arena during<br>Task 3 | Treatment                      | 5 | 0.045 | 0.831  |
|                                                                                      | Trial<br>number                | 5 | 1.499 | 0.221  |
|                                                                                      | Mantle<br>length               | 5 | 0.561 | 0.454  |
|                                                                                      | Preference<br>strength         | 5 | 0.491 | 0.484  |
|                                                                                      | Treatment<br>* Trial<br>number | 5 | 2.005 | 0.157  |
| Improvements over<br>successive trials in correct<br>exit choice during Task 3       | Treatment                      | 5 | 0.143 | 0.705  |
|                                                                                      | Trial<br>number                | 5 | 3.117 | 0.078  |

|                                                                                   |                          |   |        |         |
|-----------------------------------------------------------------------------------|--------------------------|---|--------|---------|
|                                                                                   | Mantle length            | 5 | 1.529  | 0.216   |
|                                                                                   | Preference strength      | 5 | 0.284  | 0.594   |
|                                                                                   | Treatment * Trial number | 5 | 0.018  | 0.892   |
| Improvements in number of trials needed to pass successive Tasks                  | Treatment                | 5 | 4.059  | 0.044*  |
|                                                                                   | Task number              | 5 | 40.842 | <0.001* |
|                                                                                   | Preference strength      | 5 | 8.677  | 0.003*  |
|                                                                                   | Treatment * Task number  | 5 | 1.249  | 0.535   |
| Improvements in time to exit arena in successive Tasks                            | Treatment                | 5 | 0.333  | 0.564   |
|                                                                                   | Task number              | 5 | 4.446  | 0.108   |
|                                                                                   | Preference strength      | 5 | 0.032  | 0.858   |
|                                                                                   | Treatment * Task number  | 5 | 3.981  | 0.137   |
| Improvements in percentage of trials with correct exit choice in successive Tasks | Treatment                | 5 | 0.331  | 0.565   |
|                                                                                   | Task number              | 5 | 2.919  | 0.232   |
|                                                                                   | Preference strength      | 5 | 0.144  | 0.705   |
|                                                                                   | Treatment * Task number  | 5 | 2.103  | 0.350   |
